# Supplementary material for: Generation of hydroxyl radical-activatable ratiometric near-infrared bimodal probes for early monitoring of tumor response to therapy
Source: PubMed Central journal article supplement (PMC8536768; doi:10.1038/s41467-021-26380-y), 2021-10-22
Supplement: 41467_2021_26380_MOESM2_ESM.pdf [file 41467_2021_26380_MOESM2_ESM.pdf]

## **Description of Additional Supplementary Files**

File Name: Supplementary Data 1

Description: Summary of the coordinates and energies of stationary points regarding the DFT calculations.
